# Supplementary material for: A New Hendra Virus Genotype Found in Australian Flying Foxes
Source: Research Square preprint supplement (doi:10.21203/rs.3.rs-616496/v1), 2021-06-18
Supplement: Supplementary file 1 [file 7d085d35642e0cab11e68af6.docx]

**Supplementary figure 1. Alignment of HeV-G2 M gene sequences amplified by PCR**

Consensus    GCCCCCTTCACCATCTCTTACCATGGAAAAAAGTTTTGACTGGCGGGTCAATATTCAATG  60

2013-01     ............................................................

2019-01     ............................................................

2019-02      ......................G.....................................

2020-01      ............................................................

2020-02      ............................................................

2020-03      ............................................................

Consensus    CTGTCAAGGTTTGCCGTAACGTAGATCAGATTCAACTGGAAAAGCAACAATCATTGAGGA  120

2013-01      ............................................................

2019-01      ............................................................

2019-02     ............................................................

2020-01     ............................................................

2020-02      ............................................................

2020-03      ............................................................

Consensus    TTTTTTTCCTAAGTATTACCAAATTGAATGATTCCGGTATCTACATGATCCCGAGAACAA  180

2013-01     ....................................................A.......

2019-01     ....................................................A.......

2019-02      ............................................................

2020-01      ............................................................

2020-02      ............................................................

2020-03      ............................................................

Consensus    TGTTGGAATTCAGAAGGAACAATGCCATTGCTTTTAATCTTCTGATATACCTCAAAATTG  240

2020-02      ............................................................

2019-02      ............................................................

2013-01     ............................................................

2019-01     ............................................................

2020-01      ............................................................

2020-03      ............................................................

Consensus    ATGCAGATCTTGCAAAAGCCGGAATCCAAGGGAGTCTCGACAAGGACGGAGCTAAAGTGG 300

2013-01      ............................................................

2019-01      ............................................................

2019-02      ............................................................

2020-01     ............................................................

2020-02      ..................................C.........................

2020-03     ..................................C.........................
